# Supplementary material for: Genetic risk for Alzheimer’s disease is concentrated in specific macrophage and microglial transcriptional networks
Source: Genome Med. 2018 Feb 26;10:14. doi: 10.1186/s13073-018-0523-8 (PMC5828245; doi:10.1186/s13073-018-0523-8)
Supplement: Supplementary file 9 — Table S8. Results from the de novo motif analysis performed using HOMER on microglia ATAC-seq peaks. (XLSX 10 kb) [file 13073_2018_523_MOESM9_ESM.xlsx]

## Sheet: Sheet1
Results from the de novo motif analysis performed using HOMER on microglia ATAC-sequencing peaks
P-value	log P-pvalue	% of Targets	% of Background	Best Match/Details	Name in text
1e-11483	-26440	0.3223	0.1081	PB0058.1_Sfpi1_1/Jaspar(0.963)	PU.1
1e-5250	-12090	0.0801	0.014	BORIS(Zf)/K562-CTCFL-ChIP-Seq(GSE32465)/Homer(0.957)	BORIS
1e-1840	-4237	0.0766	0.0299	PU.1-IRF(ETS:IRF)/Bcell-PU.1-ChIP-Seq(GSE21512)/Homer(0.940)	PU.1-IRF
1e-1077	-2482	0.1229	0.0729	IRF2(IRF)/Erythroblas-IRF2-ChIP-Seq(GSE36985)/Homer(0.879)	IRF2
1e-786	-1810	0.0911	0.054	Fra1(bZIP)/BT549-Fra1-ChIP-Seq(GSE46166)/Homer(0.990)	Fra1
1e-711	-1638	0.1365	0.0924	E2F6/MA0471.1/Jaspar(0.795)	E2F6
1e-668	-1539	0.0775	0.0457	CEBPE/MA0837.1/Jaspar(0.959)	CEBPE
1e-592	-1364	0.0727	0.0436	PB0097.1_Zfp281_1/Jaspar(0.754)	Zfp281
1e-568	-1310	0.0698	0.0418	POL006.1_BREu/Jaspar(0.797)	BREU
1e-563	-1299	0.0807	0.0505	HINFP/MA0131.2/Jaspar(0.641)	HINFP
1e-555	-1279	0.1522	0.1105	RUNX(Runt)/HPC7-Runx1-ChIP-Seq(GSE22178)/Homer(0.936)	RUNX
1e-333	-768.9	0.1217	0.0921	Usf2(bHLH)/C2C12-Usf2-ChIP-Seq(GSE36030)/Homer(0.958)	Usf2
1e-271	-626	0.0543	0.0365	Mef2a(MADS)/HL1-Mef2a.biotin-ChIP-Seq(GSE21529)/Homer(0.969)	Mef2A
1e-260	-599.7	0.0503	0.0336	SPI1/MA0080.4/Jaspar(0.634)	SPI1
1e-239	-552.1	0.1053	0.0816	SP1/MA0079.3/Jaspar(0.689)	SP1
1e-176	-406.7	0.1055	0.085	Etv2(ETS)/ES-ER71-ChIP-Seq(GSE59402)/Homer(0.967)(0.586)	Etv2
1e-176	-405.5	0.1556	0.1311	PB0181.1_Spdef_2/Jaspar(0.797)	Spdef_2
1e-53	-122.4	0.0803	0.0703	PB0182.1_Srf_2/Jaspar(0.898)	Srf_2
1e-18	-42.19	0.0002	0	POL008.1_DCE_S_I/Jaspar(0.571)	DCE
