# Supplementary material for: Genetic risk for Alzheimer’s disease is concentrated in specific macrophage and microglial transcriptional networks
Source: Genome Med. 2018 Feb 26;10:14. doi: 10.1186/s13073-018-0523-8 (PMC5828245; doi:10.1186/s13073-018-0523-8)
Supplement: Supplementary file 11 — Table S10. Enrichment of AD heritability at variants within motifs containing microglia ATAC-seq peaks. (XLSX 30 kb) [file 13073_2018_523_MOESM11_ESM.xlsx]

## Sheet: Supplementary_Table_10.csv
Enrichment of AD heritability at variants within motifs containing microglia ATAC peaks.
Transcription Factor	Proportion of SNPs	Proportion of h2	Proportion of h2 SE	Enrichment	Enrichment SE	Enrichment P	Corrected Enrichment P	Coefficient	Coefficient SE	Coefficient z-score	Coefficient z-score P
SPI1	0.0403638	0.65697	0.21015	16.2762	5.2064	0.00109646	0.00438584	1.34e-07	4.89e-08	2.733	0.00627607
Spdef	0.0197359	0.393222	0.143169	19.9241	7.25422	0.00992798	0.0397119	1.36e-07	7.81e-08	1.74657	0.0807113
no motif	0.015268	0.309432	0.145509	20.2668	9.53036	0.0420587	0.168235	1.65e-07	9.44e-08	1.74836	0.0804015
RUNX	0.0190023	0.267717	0.156824	14.0886	8.25288	0.1031	0.412399	8.26e-08	8.68e-08	0.952139	0.341026
